# Supplementary material
Source: MDPI journal article supplement (https://www.mdpi.com/2073-4395/10/4/536)
Supplement: s1 [file s1]

# Survey on Sustainable Agricultural Practices for Kharif Crops in the State of Rajasthan

## Stakeholder' Survey (2018-19)

Please Tick (√)

|                      |                                    |                                            |
|----------------------|------------------------------------|--------------------------------------------|
| Farmer ( )           | Service provider ( )               | Policy maker ministry of agriculture ( )   |
| Division Officer ( ) | Agriculture research Institute ( ) | Policy maker department of agriculture ( ) |
| Seed supplier ( )    | Fertilizer supplier ( )            | Irrigation department ( )                  |
| Dealer/broker ( )    | Consumer ( )                       | Retailer/wholesaler ( )                    |

| Questionnaire                                                           | Extremely Preferred | Strongly Preferred | Essentially Preferred | Moderately Preferred | Equally Preferred | Intermediately significant |   |   |   |
|-------------------------------------------------------------------------|---------------------|--------------------|-----------------------|----------------------|-------------------|----------------------------|---|---|---|
|                                                                         | 9                   | 7                  | 5                     | 3                    | 1                 | 2                          | 4 | 6 | 8 |
| What scores do you assign to ACF with reference to criteria Production? |                     |                    |                       |                      |                   |                            |   |   |   |
| What scores do you assign to ACF with reference to criteria PC?         |                     |                    |                       |                      |                   |                            |   |   |   |
| What scores do you assign to ACF with reference to criteria SP?         |                     |                    |                       |                      |                   |                            |   |   |   |
| What scores do you assign to PCF with reference to criteria ACF?        |                     |                    |                       |                      |                   |                            |   |   |   |
| What scores do you assign to PCF with reference to criteria PC?         |                     |                    |                       |                      |                   |                            |   |   |   |
| What scores do you assign to PCF with reference to criteria SP?         |                     |                    |                       |                      |                   |                            |   |   |   |
| What scores do you assign to PC with reference to criteria ACF?         |                     |                    |                       |                      |                   |                            |   |   |   |
| What scores do you assign to PC with reference to criteria PCF?         |                     |                    |                       |                      |                   |                            |   |   |   |
| What scores do you assign to PC with reference to criteria SP?          |                     |                    |                       |                      |                   |                            |   |   |   |
| What scores do you assign to SP with reference to criteria ACF?         |                     |                    |                       |                      |                   |                            |   |   |   |
| What scores do you assign to SP with reference to criteria PCF?         |                     |                    |                       |                      |                   |                            |   |   |   |
| What scores do you assign to SP with reference to criteria PC?          |                     |                    |                       |                      |                   |                            |   |   |   |

Note:

- Area of crop field (ACF), production of crop field (PCF), production cost (PC), and sales price (SP).
- Pairwise comparison of similar criteria is one. Pairwise comparison of two criteria for vice versa condition is reciprocal.

## Summary of Stakeholder Survey Results

### Decision Maker-1

|     | ACF   | PCF | PC  | SP  |
|-----|-------|-----|-----|-----|
| ACF | 1     | 2   | 4   | 8   |
| PCF | 0.5   | 1   | 0.5 | 0.5 |
| PC  | 0.25  | 2   | 1   | 2   |
| SP  | 0.125 | 2   | 0.5 | 1   |

### Decision Maker-2

|     | ACF   | PCF | PC  | SP  |
|-----|-------|-----|-----|-----|
| ACF | 1     | 2   | 8   | 8   |
| PCF | 0.5   | 1   | 0.5 | 0.5 |
| PC  | 0.125 | 2   | 1   | 2   |
| SP  | 0.125 | 2   | 0.5 | 1   |

### Decision Maker-3

|     | ACF   | PCF | PC  | SP    |
|-----|-------|-----|-----|-------|
| ACF | 1     | 2   | 2   | 8     |
| PCF | 0.5   | 1   | 0.5 | 0.125 |
| PC  | 0.5   | 2   | 1   | 2     |
| SP  | 0.125 | 8   | 0.5 | 1     |

### Decision Maker-4

|     | ACF   | PCF | PC  | SP   |
|-----|-------|-----|-----|------|
| ACF | 1     | 2   | 8   | 8    |
| PCF | 0.5   | 1   | 0.5 | 0.25 |
| PC  | 0.125 | 2   | 1   | 2    |
| SP  | 0.125 | 4   | 0.5 | 1    |

### Decision Maker-5

|     | ACF   | PCF | PC  | SP   |
|-----|-------|-----|-----|------|
| ACF | 1     | 2   | 2   | 8    |
| PCF | 0.5   | 1   | 0.5 | 0.25 |
| PC  | 0.5   | 2   | 1   | 2    |
| SP  | 0.125 | 4   | 0.5 | 1    |

### Decision Maker-6

|     | ACF   | PCF | PC  | SP    |
|-----|-------|-----|-----|-------|
| ACF | 1     | 2   | 4   | 8     |
| PCF | 0.5   | 1   | 0.5 | 0.125 |
| PC  | 0.25  | 2   | 1   | 2     |
| SP  | 0.125 | 8   | 0.5 | 1     |
